# Supplementary material for: Transplantation of human induced pluripotent stem cell-derived cardiomyocytes improves myocardial function and reverses ventricular remodeling in infarcted rat hearts
Source: PubMed Central journal article supplement (PMC7033912; doi:10.1186/s13287-020-01602-0), 2020-02-21

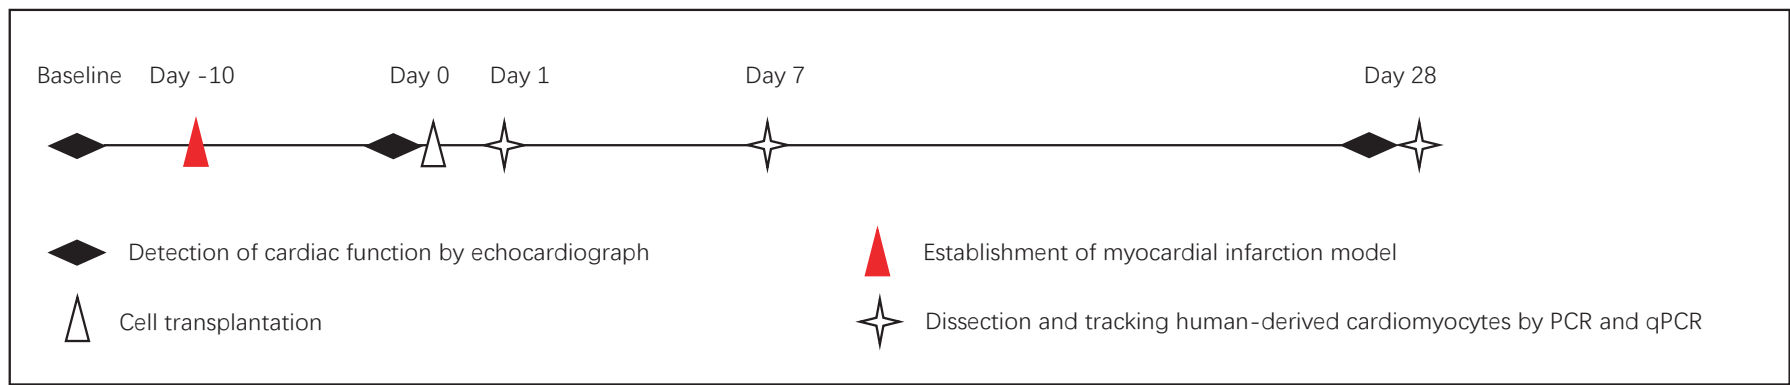

Supplement: 13287_2020_1602_MOESM1_ESM.pdf [file 13287_2020_1602_MOESM1_ESM.pdf]
